# Supplementary material for: Tunable thermosensitive behavior of multiple responsive chitin
Source: Royal Society of Chemistry journal article supplement (doi:10.1039/c4tb00067f), 2014-01-01
Supplement: c4tb00067f1.pdf [file c4tb00067f1.pdf]

## Tunable thermosensitive behavior of multiple responsive chitin

Fuyuan Ding<sup>a</sup>, Zheng Tang<sup>a</sup>, Beibei Ding<sup>b</sup>, Yuan Xiong<sup>a</sup>, Jie Cai<sup>b</sup>, Hongbing Deng<sup>a</sup>, Yumin Du<sup>a</sup>, Xiaowen Shi<sup>\*a</sup>

<sup>a</sup>*School of Resource and Environmental Science and Hubei Biomass-Resource Chemistry and Environmental Biotechnology Key Laboratory, Wuhan University, Wuhan, 430079, China*

<sup>b</sup>*Department of Chemistry, Wuhan University, Wuhan, 430072, China*

\* Corresponding author, +86-027-68778501, shixwwhu@163.com

### FT-IR and <sup>1</sup>H-NMR of Acrylamide-modified Chitin

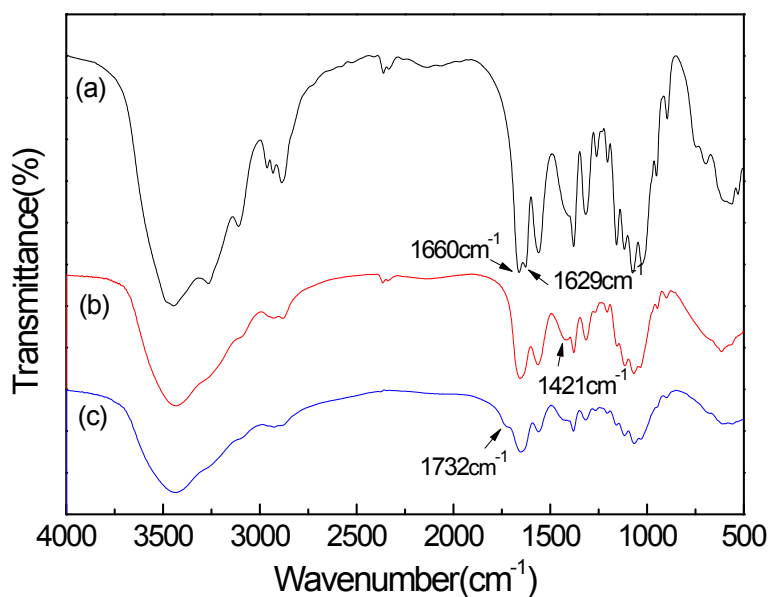

Fig. S1 FT-IR spectra of original chitin(a), acrylamide-modified chitin(AMC3) (b) and acrylamide-modified chitin hydrogel(AMCH3) (c).

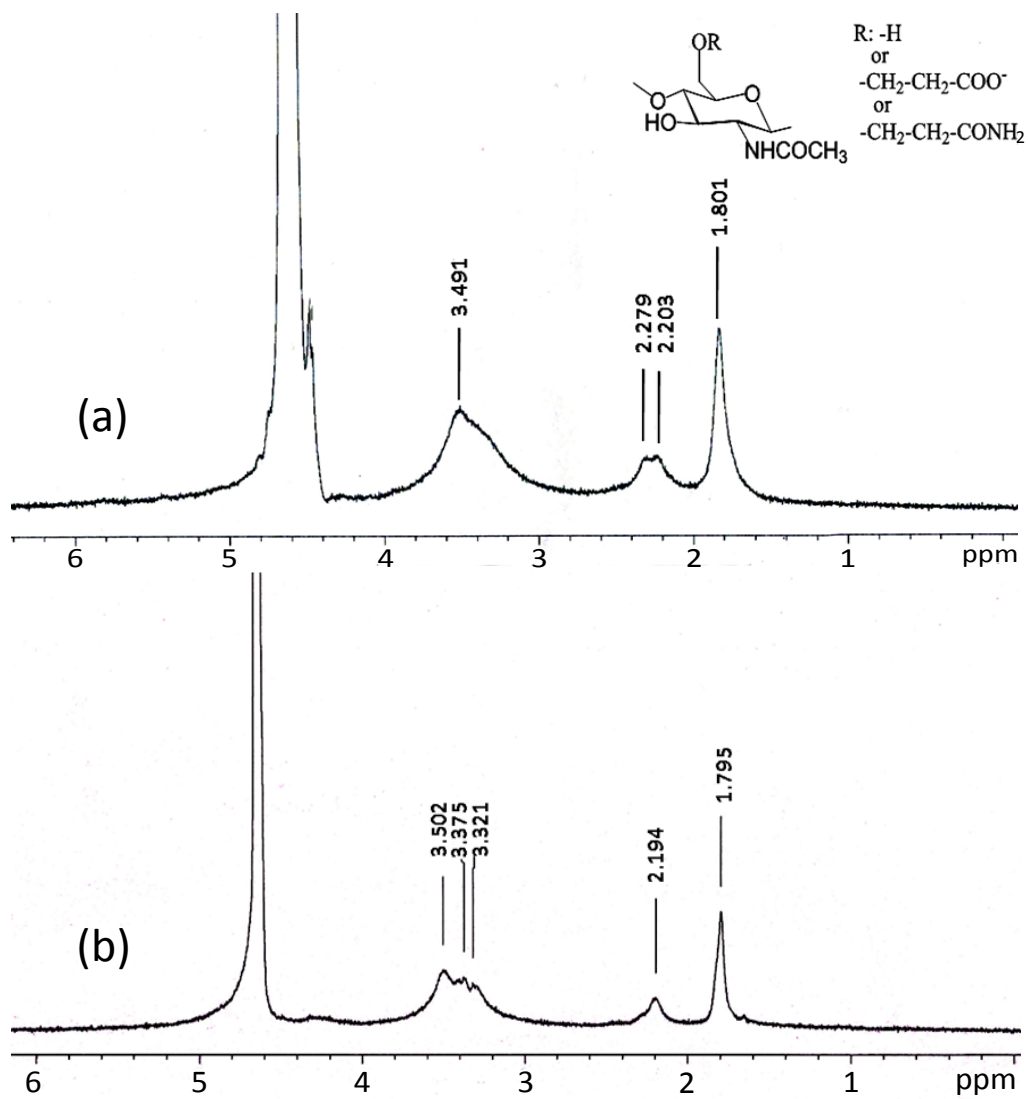

Fig. S2 <sup>1</sup>H-NMR spectrum of acrylamide-modified chitin (a) and hydrolyzed acrylamide-modified chitin (b).
